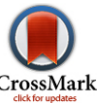

## Correction

# Correction: Liver Grafts for Transplantation from Donors with Diabetes: An Analysis of the Scientific Registry of Transplant Recipients Database

The *PLOS ONE* Staff

The third affiliation for the authors was omitted. Please refer to the complete affiliations below:

Jun Zheng<sup>1,2,3</sup> Jie Xiang<sup>1,3</sup> Jie Zhou<sup>1,3</sup> Zhiwei Li<sup>1,3</sup> Zhenhua Hu<sup>1,3</sup> Chung Mau Lo,<sup>2\*</sup> Weilin Wang<sup>1,3\*</sup>

<sup>1</sup>Division of Hepatobiliary and Pancreatic Surgery, Department of Surgery, First Affiliated Hospital, School of Medicine, Zhejiang University, Hangzhou, Zhejiang, China

<sup>2</sup>Department of Surgery, The University of Hong Kong, Hong Kong

<sup>3</sup>Key Laboratory of Combined Multi-organ Transplantation, Ministry of Public Health Key Laboratory of Organ Transplantation, Hangzhou, Zhejiang, China.

## Reference

1. Zheng J, Xiang J, Zhou J, Li Z, Hu Z, et al. (2014) Liver Grafts for Transplantation from Donors with Diabetes: An Analysis of the Scientific Registry of Transplant Recipients Database. *PLoS ONE* 9(5): e98104. doi:10.1371/journal.pone.0098104

**Citation:** The *PLOS ONE* Staff (2014) Correction: Liver Grafts for Transplantation from Donors with Diabetes: An Analysis of the Scientific Registry of Transplant Recipients Database. *PLoS ONE* 9(8): e106226. doi:10.1371/journal.pone.0106226

**Published:** August 15, 2014

**Copyright:** © 2014 The *PLOS ONE* Staff. This is an open-access article distributed under the terms of the Creative Commons Attribution License, which permits unrestricted use, distribution, and reproduction in any medium, provided the original author and source are credited.
